# Supplementary material
Source: PubMed Central journal article supplement (PMC1785083)
Supplement: blood_blood-2006-05-024091_1.pdf [file blood_blood-2006-05-024091_1.pdf]

| Reactions                  | 1                | 2                 | 3                 | 4                | 5                 | 6                | 7                 | 8                | 9                 | 10                | 11                |
|----------------------------|------------------|-------------------|-------------------|------------------|-------------------|------------------|-------------------|------------------|-------------------|-------------------|-------------------|
| $\beta$ TMpep              | 4.6              | 11.7              | 83.7              |                  |                   |                  |                   |                  |                   |                   |                   |
| $\alpha_{SC}$ TMpep        |                  |                   |                   | 15.1             | 66.1              | 18.8             |                   |                  |                   |                   |                   |
| $\alpha_{SC}+\beta$ TMpeps | 2.8 <sup>b</sup> | 6.9 <sup>b</sup>  | 12.9 <sup>b</sup> | 4.5 <sup>a</sup> | 15.5 <sup>a</sup> | 7.6 <sup>a</sup> | 72.4 <sup>a</sup> |                  |                   |                   |                   |
| $\alpha_{CS}$ TMpep        |                  |                   |                   |                  |                   |                  |                   | 11.4             | 35.0              | 53.6              |                   |
| $\alpha_{CS}+\beta$ TMpeps | 3.8 <sup>b</sup> | 14.9 <sup>b</sup> | 15.1 <sup>b</sup> |                  |                   |                  |                   | 6.7 <sup>a</sup> | 12.7 <sup>a</sup> | 18.2 <sup>a</sup> | 62.4 <sup>a</sup> |
|                            |                  |                   |                   |                  |                   |                  |                   |                  |                   |                   | 66.2 <sup>b</sup> |

| Reactions                  | 1                | 2                 | 3                 | 12                | 13   | 14               | 15                | 16                | 17                |
|----------------------------|------------------|-------------------|-------------------|-------------------|------|------------------|-------------------|-------------------|-------------------|
| $\alpha_{CC}$ TMpep        |                  |                   |                   | 47.3              | 12.6 | 25.9             |                   |                   |                   |
| $\alpha_{CC}+\beta$ TMpeps | 3.2 <sup>b</sup> | 14.2 <sup>b</sup> | 42.0 <sup>b</sup> | 14.8 <sup>a</sup> |      | 5.9 <sup>a</sup> | 22.9 <sup>a</sup> | 15.6 <sup>a</sup> | 26.3 <sup>a</sup> |
|                            |                  |                   |                   |                   |      |                  | 20.7 <sup>b</sup> | 7.3 <sup>b</sup>  | 12.6 <sup>b</sup> |

<sup>a</sup> Percentage of the  $\alpha$  TM peptide.

<sup>b</sup> Percentage of the  $\beta$  TM peptide.
