# Supplementary material
Source: PubMed Central journal article supplement (PMC1785083)

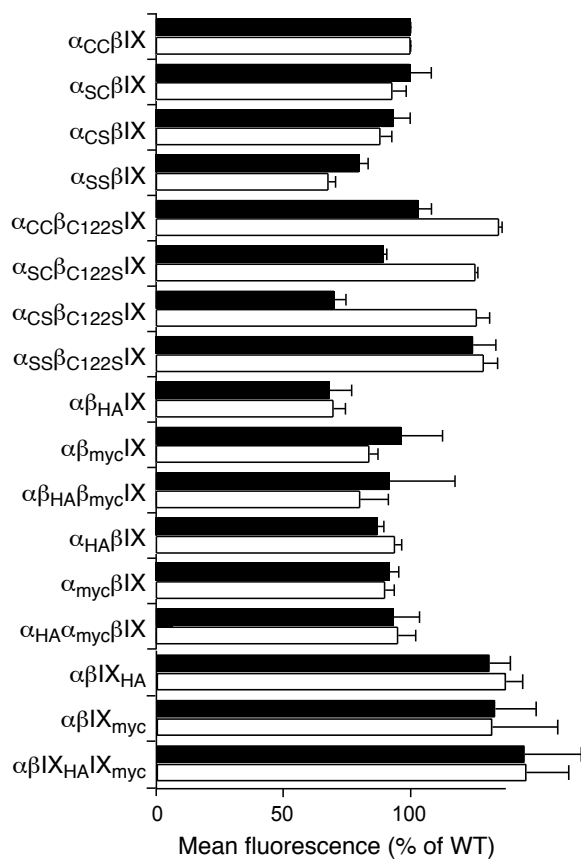

Supplement: blood_blood-2006-05-024091_2.pdf [file blood_blood-2006-05-024091_2.pdf]

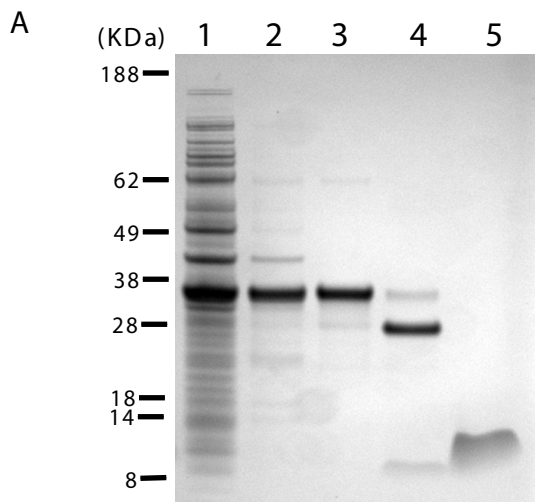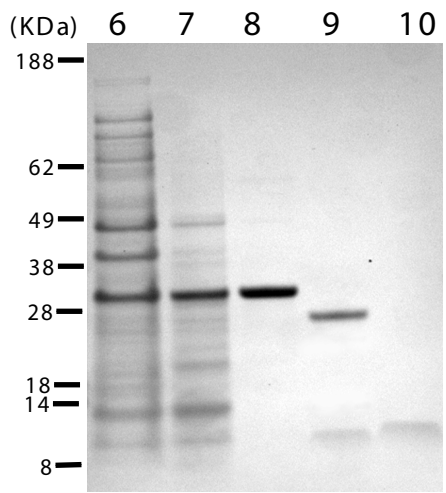

**B**

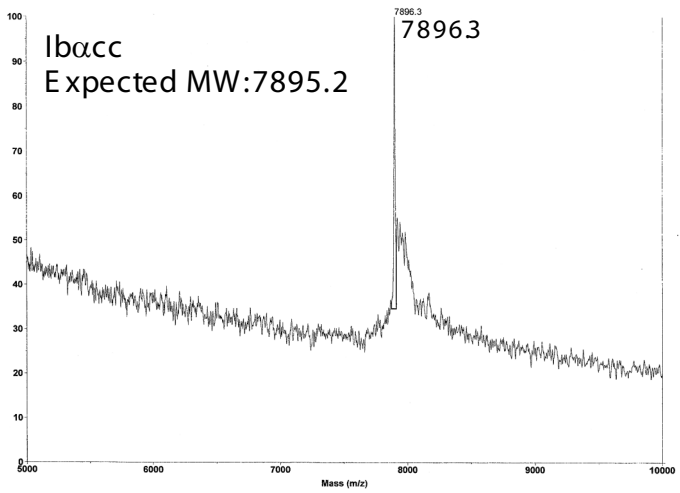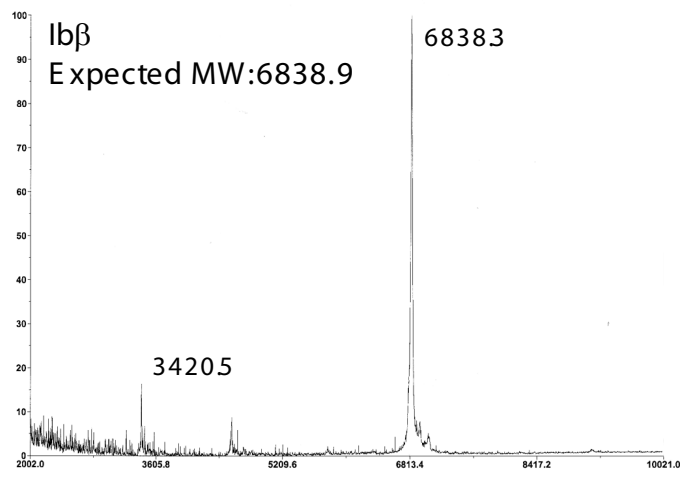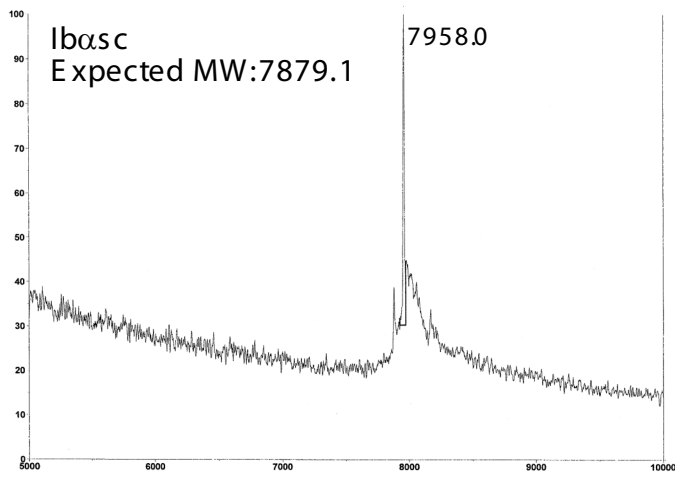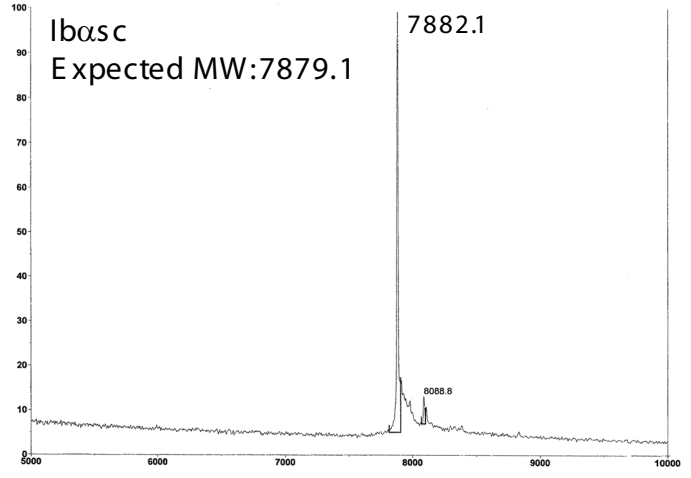

Supplement: blood_blood-2006-05-024091_3.pdf [file blood_blood-2006-05-024091_3.pdf]
